# Supplementary material
Source: PubMed Central journal article supplement (PMC4646250)
Supplement: supp_M115.674192_jbc.M115.674192-1.pdf [file supp_M115.674192_jbc.M115.674192-1.pdf]

Table S1. Yeast strains used in this study

| Strain Name | Genotype                                                                           | Source         |
|-------------|------------------------------------------------------------------------------------|----------------|
| JM286       | <i>rgf1::his3+ leu1::Rgf1-GFP his3-D1 leu1-32 h-</i>                               | Lab Collection |
| JM366       | <i>972 h-</i>                                                                      | Lab Collection |
| JM837       | <i>leu1-32 h-</i>                                                                  | Lab Collection |
| JM1243      | <i>pil1Δ::natR h-</i>                                                              | Lab Collection |
| JM1262      | <i>pil1-mCherry::natR h-</i>                                                       | Lab Collection |
| JM1457      | <i>sle1Δ::natR h-</i>                                                              | Lab Collection |
| JM2212      | <i>GFP(S65T)-2xPH(PLCδ)::leu1+ ade6-M216 ura4-D18 leu1-32 h+</i>                   | This study     |
| JM2218      | <i>gad8Δ::natR ura4-D18 leu1-32 ade6-M216 h+</i>                                   | This study     |
| JM2326      | <i>Prtn1-PHnum1-GFP::ura4+ leu1-32 ade6</i>                                        | Lab Collection |
| JM2761      | <i>tor1-L2045D::hygR h-</i>                                                        | Lab Collection |
| JM2816      | <i>tor1-L2045D::hygR pil1Δ::natR</i>                                               | Lab Collection |
| JM2817      | <i>tor1-L2045D::hygR sle1Δ::kanMX6</i>                                             | Lab Collection |
| JM2820      | <i>tor1-L2045D::hygR syj1Δ::natR</i>                                               | Lab Collection |
| JM2832      | <i>syj1-mEGFP::kanMX6 h+</i>                                                       | Lab Collection |
| JM3066      | <i>pmk1Δ::kanMX6 ura4-D18 leu1-32 ade6-M216 h+</i>                                 | Lab Collection |
| JM3309      | <i>rho2Δ::kanMX6 GFP-Rho2::leu1+ ade6-M216 ura4-D18 leu1-32 h+</i>                 | This study     |
| JM3613      | <i>bit61Δ::kanMX6 ura4-D18 leu1-32 ade6-M216 h+</i>                                | This study     |
| JM3614      | <i>bit61Δ::kanMX6 pil1Δ::natR leu1-32</i>                                          | This study     |
| JM3615      | <i>ste20Δ::kanMX6 ura4-D18 leu1-32 ade6-M216 h+</i>                                | This study     |
| JM3616      | <i>ste20Δ::kanMX6 pil1Δ::natR leu1-32</i>                                          | This study     |
| JM3617      | <i>wat1Δ::kanMX6 ura4-D18 leu1-32 ade6-M216 h+</i>                                 | This study     |
| JM3618      | <i>wat1Δ::kanMX6 pil1Δ::natR leu1-32</i>                                           | This study     |
| JM3619      | <i>sin1Δ::kanMX6 ura4-D18 leu1-32 ade6-M216 h+</i>                                 | This study     |
| JM3620      | <i>sin1Δ::kanMX6 pil1Δ::natR leu1-32</i>                                           | This study     |
| JM3621      | <i>pmk1Δ::kanMX6 tor1-L2045D::hygR leu1-32</i>                                     | This study     |
| JM3622      | <i>pmk1Δ::kanMX6 pil1Δ::natR tor1-L2045D::hygR ade6-M216 ura4-D18</i>              | This study     |
| JM3623      | <i>pmk1Δ::kanMX6 pil1Δ::natR ura4-D18 leu1-32 ade6-M216</i>                        | This study     |
| JM3624      | <i>pmk1Δ::kanMX6 sle1Δ::kanMX6 tor1-L2045D::hygR ade6-M21X</i>                     | This study     |
| JM3625      | <i>pmk1Δ::kanMX6 sle1Δ::natR</i>                                                   | This study     |
| JM3626      | <i>pmk1Δ::kanMX6 syj1Δ::natR tor1-L2045D::hygR ura4-D18 leu1-32 ade6-M216</i>      | This study     |
| JM3627      | <i>pmk1Δ::kanMX6 syj1Δ::natR ura4-D18 leu1-32</i>                                  | This study     |
| JM3628      | <i>GFP(S65T)-2xPH(PLCδ)::leu1+ pil1Δ::natR leu1-32</i>                             | This study     |
| JM3629      | <i>GFP(S65T)-2xPH(PLCδ)::leu1+ its3-1 ade6-M216 ura4-D18 leu1-32</i>               | This study     |
| JM3630      | <i>GFP(S65T)-2xPH(PLCδ)::leu1+ its3-1 pil1Δ::natR ade6-M216 ura4-D18 leu1-32</i>   | This study     |
| JM3631      | <i>GFP(S65T)-2xPH(PLCδ)::leu1+ syj1Δ::natR leu1-32 ade6-M216</i>                   | This study     |
| JM3632      | <i>GFP(S65T)-2xPH(PLCδ)::leu1+ sle1Δ::natR leu1-32 ade6-M216</i>                   | This study     |
| JM3633      | <i>GFP(S65T)-2xPH(PLCδ)::leu1+ inp53Δ::kanMX6 ade6-M216 ura4-D18 leu1-32</i>       | This study     |
| JM3634      | <i>GFP(S65T)-2xPH(PLCδ)::leu1+ pil1-mCherry::natR leu1-32 ura4-D18</i>             | This study     |
| JM3635      | <i>its3-mCherry::natR GFP(S65T)-2xPH(PLCδ)::leu1+ leu1-32</i>                      | This study     |
| JM3636      | <i>rho2Δ::kanMX6 GFP-Rho2::leu1+ pil1Δ::natR ade6-M216 ura4-D18 leu1-32</i>        | This study     |
| JM3637      | <i>rho2Δ::kanMX6 GFP-Rho2::leu1+ its3-1 ade6-M216 ura4-D18 leu1-32</i>             | This study     |
| JM3638      | <i>rho2Δ::kanMX6 GFP-Rho2::leu1+ pil1-mCherry::natR ade6-M216 ura4-D18 leu1-32</i> | This study     |
| JM3639      | <i>rho2Δ::kanMX6 GFP-Rho2::leu1+ its3-mCherry::natR ade6-M216 ura4-D18 leu1-32</i> | This study     |
| JM3640      | <i>rho2Δ::kanMX6 its3-mCherry::natR ade6-M216 ura4-D18 leu1-32</i>                 | This study     |
| JM3641      | <i>pck2-mEGFP::kanMX6 h-</i>                                                       | This study     |
| JM3642      | <i>pck2-mEGFP::kanMX6 its3-1</i>                                                   | This study     |
| JM3643      | <i>pck2-mEGFP::kanMX6 its3-1 pil1Δ::natR</i>                                       | This study     |
| JM3644      | <i>rgf1::his3+ leu1::rgf1-GFP its3-1 his3-D1 leu1-32</i>                           | This study     |
| JM3645      | <i>rgf1::his3+ leu1::rgf1-GFP its3-1 pil1Δ::natR his3-D1 leu1-32</i>               | This study     |
| JM3736      | <i>GFP(S65T)-2xPH(PLCδ)::leu1+ syj1Δ::natR its3-1 leu1-32 ade6-M216</i>            | This study     |
| JM3737      | <i>GFP(S65T)-2xPH(PLCδ)::leu1+ sle1Δ::natR its3-1 leu1-32 ade6-M216</i>            | This study     |
| JM3738      | <i>Prtn1-PHnum1-GFP::ura4+ its3-1 leu1-32 ade6</i>                                 | This study     |
| JM3739      | <i>Prtn1-PHnum1-GFP::ura4+ pil1Δ::natR leu1-32 ade6</i>                            | This study     |
| JM3740      | <i>Prtn1-PHnum1-GFP::ura4+ its3-1 pil1::natR leu1-32 ade6</i>                      | This study     |
| JM_Sc4      | <i>MAT-a pil1Δ::NAT,LSP1-mCherry::KANMX4 his320, leu2-3,112 ura3-52 lys2-801</i>   | Lab Collection |
| JM_Sc10     | <i>MATa his320, leu2-3,112 ura3-52 lys2-801</i>                                    | Lab Collection |
| MM1273      | <i>pmk1-HA6H::ura4 ura4-D18 leu1-32</i>                                            | Lab Collection |
| MM1300      | <i>pmk1-HA6H::ura4 its3-1 ura4-D18 leu1-32</i>                                     | This study     |
| MM1315      | <i>pmk1-HA6H::ura4 syj1Δ::natR ura4-D18 leu1-32</i>                                | This study     |
| MM1277      | <i>pmk1-HA6H::ura4 syj1Δ::natR its3-1 ura4-D18 leu1-32</i>                         | This study     |
| MM1310      | <i>pmk1-HA6H::ura4 pil1Δ::natR ura4-D18 leu1-32</i>                                | This study     |
| MM1296      | <i>pmk1-HA6H::ura4 pil1Δ::natR its3-1 ura4-D18 leu1-32</i>                         | This study     |
| MM1832      | <i>pmk1-HA6H::ura4 pREP41x-its3 ura4-D18 leu1-32</i>                               | This study     |
